# Supplementary material for: Benzoimidazole-2-one based macrocyclic arenes: synthesis, and solvent-induced structural changes
Source: Royal Society of Chemistry journal article supplement (doi:10.1039/d4ce01150c), 2024-12-27
Supplement: d4ce01150c1.pdf [file d4ce01150c1.pdf]

## Electronic Supplementary Information

### Benzoimidazole-2-one based macrocyclic arenes: Synthesis, and Solvent-induced structural changes

Fei Zeng\*, Lin-Li Tang, Jian-Hao Wang, Bin Sun, Man-Hua Ding and Qin-Chun Li

Department of Biology and Chemistry, Hunan University of Science and Engineering,  
Yongzhou 425199, China.

*E-mail: zengfei@iccas.ac.cn*

#### Contents

|                                                                                                                                                           |   |
|-----------------------------------------------------------------------------------------------------------------------------------------------------------|---|
| 1. Materials and Methods.....                                                                                                                             | 2 |
| 2. Synthesis of host 1 and 2.....                                                                                                                         | 2 |
| 3. <sup>1</sup> H NMR and <sup>13</sup> C NMR Spectral of New compounds.....                                                                              | 3 |
| 4. Crystal structures data of 1•CHCl <sub>3</sub> , 1•2CH <sub>2</sub> Br <sub>2</sub> , 2•3CHCl <sub>3</sub> and 2•CH <sub>2</sub> Cl <sub>2</sub> ..... | 5 |

## 1. Materials and Methods.

All reactions were carried out with oven-dried glassware. Commercial reagents were used without further purification. Flash column chromatography was performed on 100-200 mesh silica gel.  $^1\text{H}$  NMR,  $^{13}\text{C}$  NMR spectra were recorded on a Bruker DMX400 NMR spectrometer. Melting points were determined using WRR melting point apparatus and were uncorrected. High Resolution atmospheric-pressure chemical ionization mass spectra (APCI-MS) were determined by Bruker Daltonics, Inc, APEX II. FT-ICRMS.

## 2. Synthesis of host 1 and 2.

To a mixture of 1,3-Dihydro-2H-benzimidazol-2-one (268.1 mg, 2.0 mmol) and 1,4-bis(bromomethyl)benzene (523.8 mg, 2.0 mmol) in *N,N*-dimethylformamide (100 mL) was added caesium carbonate (1.3 g, 4.0 mmol). The mixture was stirred at 110 °C for 24 h under  $\text{N}_2$ . Then the solvent was removed in vacuo and the residue was separated by column chromatography on silica gel (eluent: 80:1 DCM/Methanol) to give macrocyclic arenes **1** and **2**.

Host **1** (80.2 mg, 17%),  $^1\text{H}$  NMR (400 MHz, Chloroform-*d*)  $\delta$  6.89 (dd,  $J = 5.8, 3.1$  Hz, 1H), 6.76 (dd,  $J = 5.8, 3.2$  Hz, 1H), 5.09 (s, 2H).  $^{13}\text{C}$  NMR (101 MHz,  $\text{CDCl}_3$ )  $\delta$  154.3, 135.6, 129.0, 127.4, 121.4, 108.2, 44.3. HRMS (APCI)  $m/z$ :  $[\text{M}+\text{H}]^+$  calcd for  $\text{C}_{30}\text{H}_{25}\text{N}_4\text{O}_2$ , 473.1972; found, 473.1970.

Host **2** (108.6 mg, 23%),  $^1\text{H}$  NMR (400 MHz, Chloroform-*d*)  $\delta$  7.35 – 7.26 (m, 12H), 6.96 (dt,  $J = 7.7, 3.3$  Hz, 6H), 6.84 (ddd,  $J = 13.9, 6.0, 3.2$  Hz, 6H), 5.14 – 4.99 (m, 12H).  $^{13}\text{C}$  NMR (101 MHz,  $\text{CDCl}_3$ )  $\delta$  154.5, 129.2, 127.9, 127.8, 127.7, 127.4, 121.5, 108.4, 108.3, 65.0, 44.7, 44.6. HRMS (APCI)  $m/z$ :  $[\text{M}+\text{H}]^+$  calcd for  $\text{C}_{45}\text{H}_{37}\text{N}_6\text{O}_3$ , 709.2922; found, 709.2921.

### 3. $^1\text{H}$ NMR and $^{13}\text{C}$ NMR Spectral of New compounds

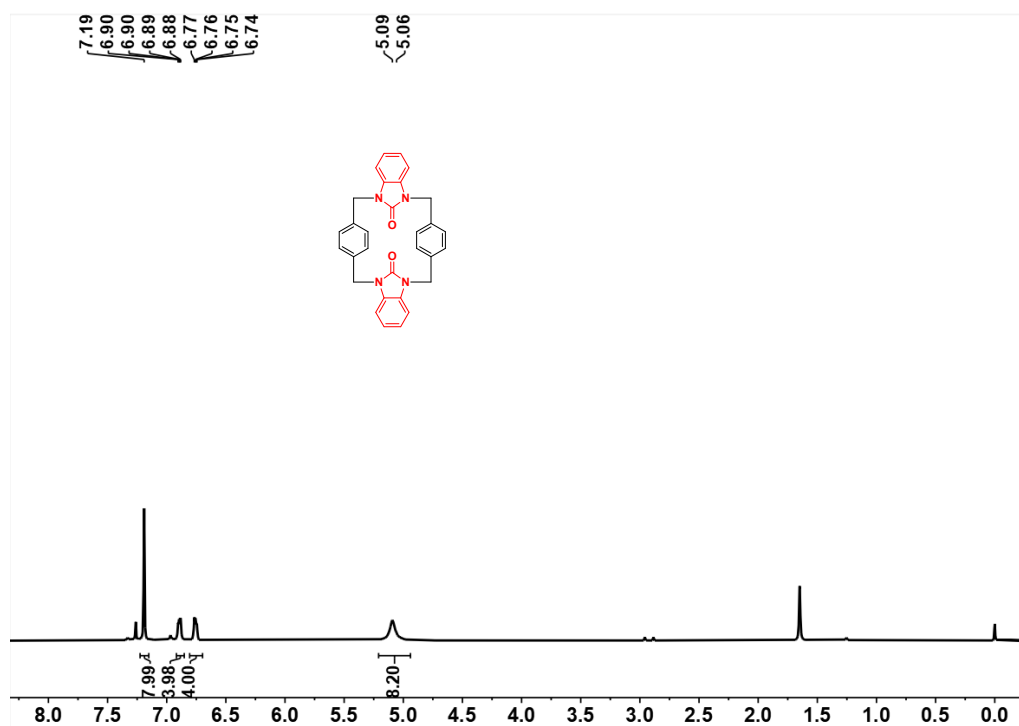

Figure S1.  $^1\text{H}$  NMR spectrum (400 MHz,  $\text{CDCl}_3$ , 298K) of 1

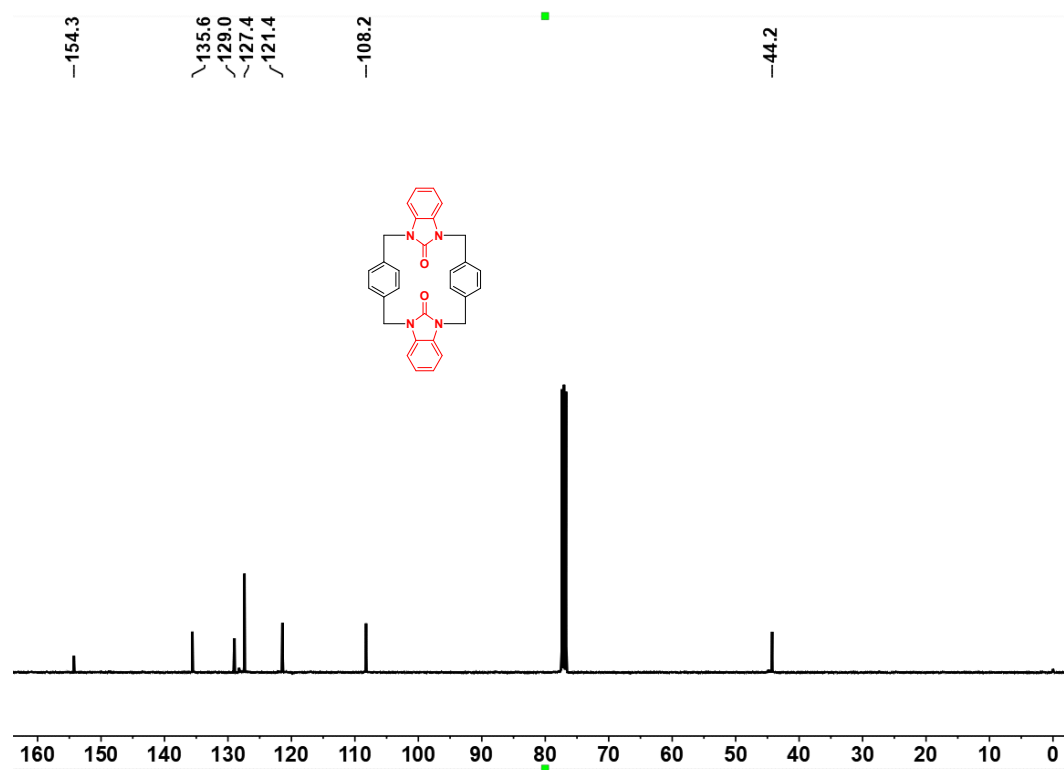

Figure S2.  $^{13}\text{C}$  NMR spectrum (101 MHz,  $\text{CDCl}_3$ , 298K) of 1

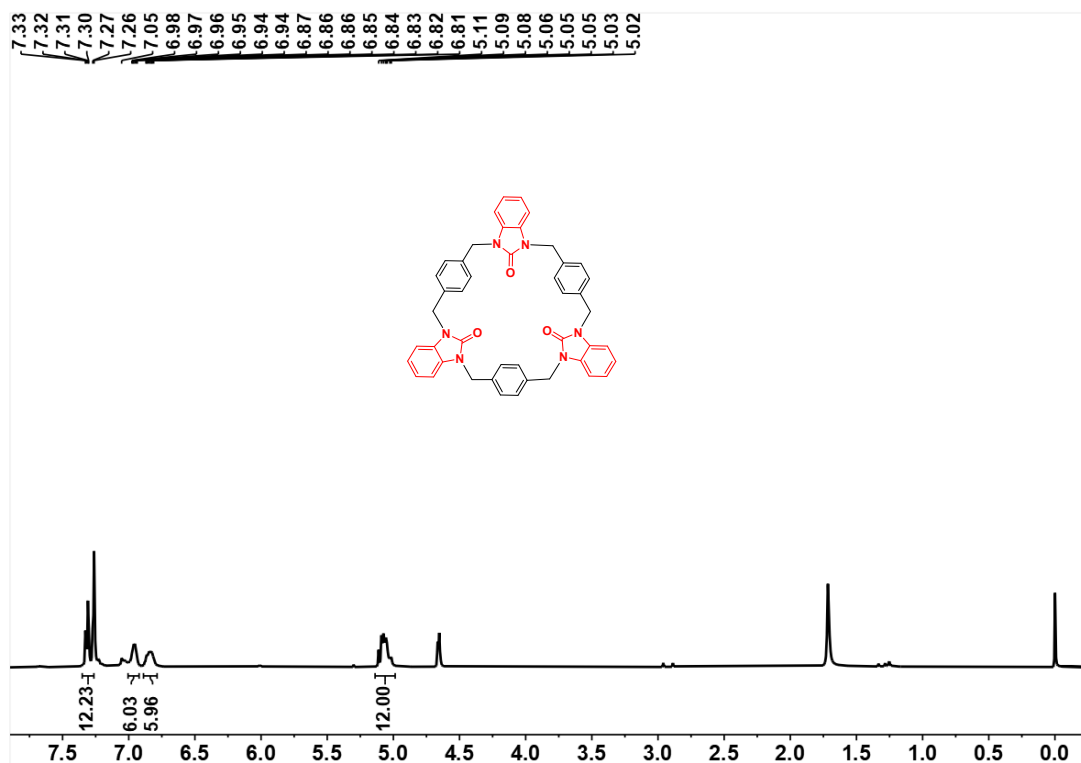

Figure S3. <sup>1</sup>H NMR spectrum (400 MHz, CDCl<sub>3</sub>, 298K) of 2

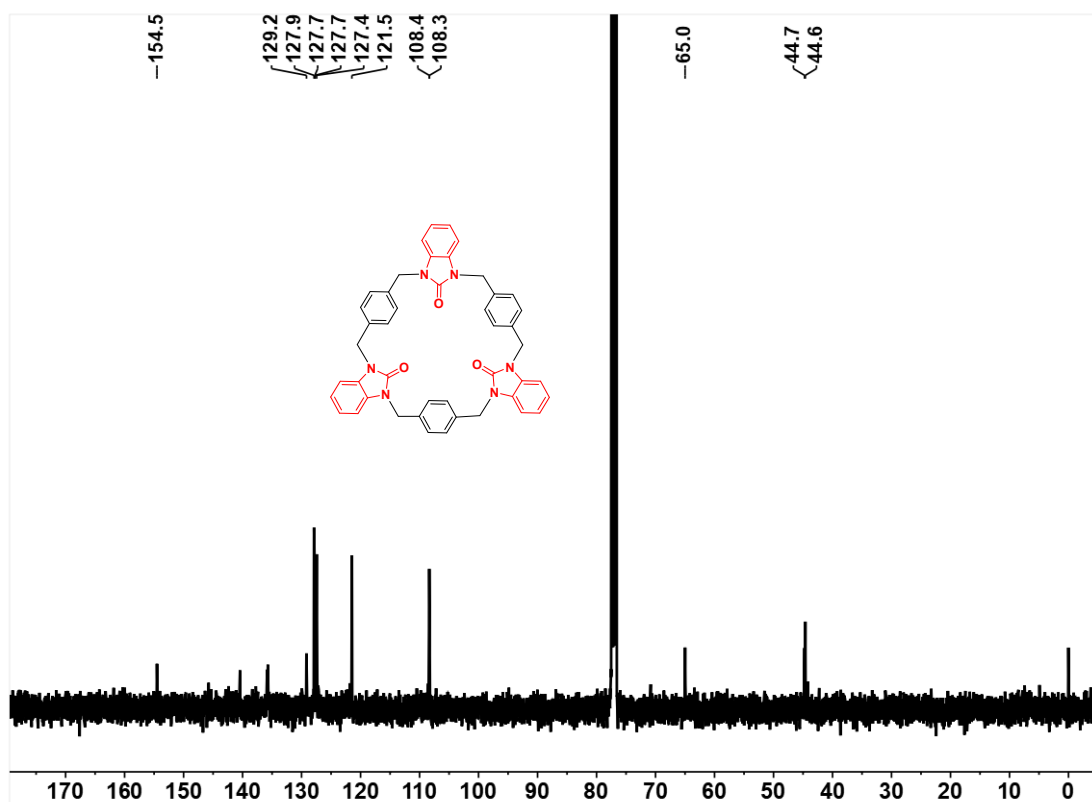

Figure S4. <sup>13</sup>C NMR spectrum (101 MHz, CDCl<sub>3</sub>, 298K) of 2

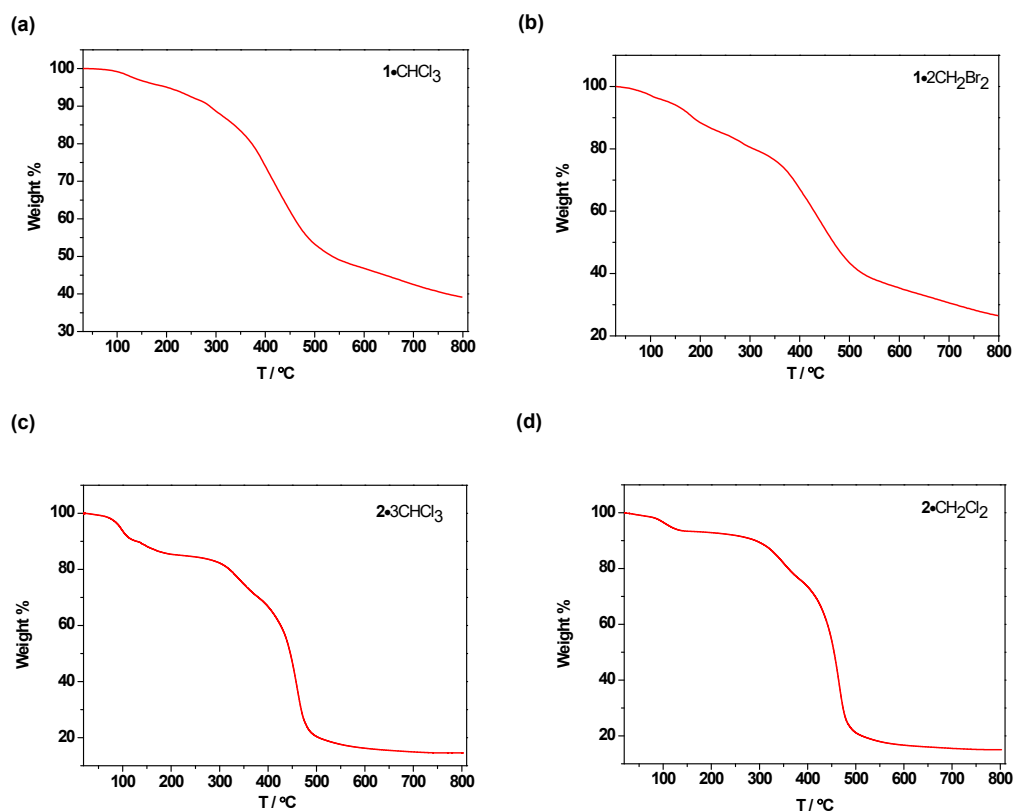

**Figure S5.** Thermogravimetric analysis of **1•CHCl<sub>3</sub>**, **1•2CH<sub>2</sub>Br<sub>2</sub>**, **2•3CHCl<sub>3</sub>** and **2•CH<sub>2</sub>Cl<sub>2</sub>**

#### 4. Crystal structures data of **1•CHCl<sub>3</sub>**, **1•2CH<sub>2</sub>Br<sub>2</sub>**, **2•3CHCl<sub>3</sub>** and **2•CH<sub>2</sub>Cl<sub>2</sub>**

##### Crystal data and structure refinement for **1•CHCl<sub>3</sub>**.

|                     |                                                                               |
|---------------------|-------------------------------------------------------------------------------|
| Identification code | <b>1•CHCl<sub>3</sub></b>                                                     |
| Empirical formula   | C <sub>31</sub> H <sub>25</sub> Cl <sub>3</sub> N <sub>4</sub> O <sub>2</sub> |
| Formula weight      | 591.90                                                                        |
| Temperature/K       | 296.15                                                                        |
| Crystal system      | monoclinic                                                                    |
| Space group         | C2/c                                                                          |
| a/Å                 | 33.696(7)                                                                     |
| b/Å                 | 10.737(2)                                                                     |
| c/Å                 | 17.724(4)                                                                     |
| α/°                 | 90                                                                            |
| β/°                 | 115.638(3)                                                                    |
| γ/°                 | 90                                                                            |

|                                             |                                                               |
|---------------------------------------------|---------------------------------------------------------------|
| Volume/Å <sup>3</sup>                       | 5781(2)                                                       |
| Z                                           | 8                                                             |
| ρ <sub>calc</sub> /cm <sup>3</sup>          | 1.360                                                         |
| μ/mm <sup>-1</sup>                          | 0.353                                                         |
| F(000)                                      | 2448.0                                                        |
| Crystal size/mm <sup>3</sup>                | 0.1 × 0.1 × 0.1                                               |
| Radiation                                   | MoKα (λ = 0.71073)                                            |
| 2θ range for data collection/°              | 2.682 to 55.064                                               |
| Index ranges                                | -43 ≤ h ≤ 43, -13 ≤ k ≤ 13, -22 ≤ l ≤ 22                      |
| Reflections collected                       | 31811                                                         |
| Independent reflections                     | 6561 [R <sub>int</sub> = 0.0783, R <sub>sigma</sub> = 0.0757] |
| Data/restraints/parameters                  | 6561/0/361                                                    |
| Goodness-of-fit on F <sup>2</sup>           | 0.998                                                         |
| Final R indexes [I ≥ 2σ (I)]                | R <sub>1</sub> = 0.0592, wR <sub>2</sub> = 0.1321             |
| Final R indexes [all data]                  | R <sub>1</sub> = 0.1518, wR <sub>2</sub> = 0.1697             |
| Largest diff. peak/hole / e Å <sup>-3</sup> | 0.31/-0.28                                                    |

### Crystal data and structure refinement for 1•2CH<sub>2</sub>Br<sub>2</sub>.

|                       |                                                                  |
|-----------------------|------------------------------------------------------------------|
| Identification code   | 1•2CH <sub>2</sub> Br <sub>2</sub>                               |
| Empirical formula     | C <sub>16</sub> H <sub>14</sub> Br <sub>2</sub> N <sub>2</sub> O |
| Formula weight        | 410.11                                                           |
| Temperature/K         | 296.15                                                           |
| Crystal system        | triclinic                                                        |
| Space group           | P-1                                                              |
| a/Å                   | 9.02(2)                                                          |
| b/Å                   | 9.39(2)                                                          |
| c/Å                   | 10.71(3)                                                         |
| α/°                   | 84.17(3)                                                         |
| β/°                   | 67.13(3)                                                         |
| γ/°                   | 66.09(3)                                                         |
| Volume/Å <sup>3</sup> | 763(3)                                                           |

|                                                |                                                               |
|------------------------------------------------|---------------------------------------------------------------|
| Z                                              | 2                                                             |
| $\rho_{\text{calc}}/\text{g}/\text{cm}^3$      | 1.786                                                         |
| $\mu/\text{mm}^{-1}$                           | 5.314                                                         |
| F(000)                                         | 404.0                                                         |
| Crystal size/ $\text{mm}^3$                    | $0.1 \times 0.1 \times 0.1$                                   |
| Radiation                                      | MoK $\alpha$ ( $\lambda = 0.71073$ )                          |
| 2 $\theta$ range for data collection/ $^\circ$ | 4.136 to 52.998                                               |
| Index ranges                                   | $-11 \leq h \leq 11, -11 \leq k \leq 11, -13 \leq l \leq 13$  |
| Reflections collected                          | 7846                                                          |
| Independent reflections                        | 3137 [ $R_{\text{int}} = 0.0875, R_{\text{sigma}} = 0.1122$ ] |
| Data/restraints/parameters                     | 3137/0/242                                                    |
| Goodness-of-fit on $F^2$                       | 0.879                                                         |
| Final R indexes [ $I \geq 2\sigma(I)$ ]        | $R_1 = 0.0444, wR_2 = 0.0802$                                 |
| Final R indexes [all data]                     | $R_1 = 0.1132, wR_2 = 0.0999$                                 |
| Largest diff. peak/hole / $e \text{ \AA}^{-3}$ | 0.40/-0.40                                                    |

#### Crystal data and structure refinement for $2 \bullet 3\text{CHCl}_3$ .

|                        |                                                             |
|------------------------|-------------------------------------------------------------|
| Identification code    | $2 \bullet 3\text{CHCl}_3$                                  |
| Empirical formula      | $\text{C}_{48}\text{H}_{39}\text{Cl}_9\text{N}_6\text{O}_3$ |
| Formula weight         | 1066.90                                                     |
| Temperature/K          | 296.15                                                      |
| Crystal system         | triclinic                                                   |
| Space group            | P-1                                                         |
| $a/\text{\AA}$         | 13.234(7)                                                   |
| $b/\text{\AA}$         | 13.892(7)                                                   |
| $c/\text{\AA}$         | 16.543(9)                                                   |
| $\alpha/^\circ$        | 109.362(7)                                                  |
| $\beta/^\circ$         | 96.339(7)                                                   |
| $\gamma/^\circ$        | 102.534(7)                                                  |
| Volume/ $\text{\AA}^3$ | 2746(3)                                                     |

|                                                |                                                               |
|------------------------------------------------|---------------------------------------------------------------|
| Z                                              | 2                                                             |
| $\rho_{\text{calc}}/\text{cm}^3$               | 1.291                                                         |
| $\mu/\text{mm}^{-1}$                           | 0.502                                                         |
| F(000)                                         | 1092.0                                                        |
| Crystal size/ $\text{mm}^3$                    | $0.15 \times 0.12 \times 0.11$                                |
| Radiation                                      | MoK $\alpha$ ( $\lambda = 0.71073$ )                          |
| 2 $\Theta$ range for data collection/ $^\circ$ | 2.662 to 50.054                                               |
| Index ranges                                   | $-15 \leq h \leq 15, -16 \leq k \leq 16, -19 \leq l \leq 19$  |
| Reflections collected                          | 26432                                                         |
| Independent reflections                        | 9686 [ $R_{\text{int}} = 0.0934, R_{\text{sigma}} = 0.1304$ ] |
| Data/restraints/parameters                     | 9686/513/595                                                  |
| Goodness-of-fit on $F^2$                       | 0.984                                                         |
| Final R indexes [ $I \geq 2\sigma(I)$ ]        | $R_1 = 0.0918, wR_2 = 0.2449$                                 |
| Final R indexes [all data]                     | $R_1 = 0.2085, wR_2 = 0.3105$                                 |
| Largest diff. peak/hole / $e \text{ \AA}^{-3}$ | 0.59/-0.48                                                    |

### Crystal data and structure refinement for **2•CH<sub>2</sub>Cl<sub>2</sub>**.

|                        |                                                                               |
|------------------------|-------------------------------------------------------------------------------|
| Identification code    | <b>2•CH<sub>2</sub>Cl<sub>2</sub></b>                                         |
| Empirical formula      | C <sub>46</sub> H <sub>38</sub> Cl <sub>2</sub> N <sub>6</sub> O <sub>3</sub> |
| Formula weight         | 793.72                                                                        |
| Temperature/K          | 296.15                                                                        |
| Crystal system         | triclinic                                                                     |
| Space group            | P-1                                                                           |
| a/ $\text{\AA}$        | 12.106(6)                                                                     |
| b/ $\text{\AA}$        | 13.118(6)                                                                     |
| c/ $\text{\AA}$        | 13.961(7)                                                                     |
| $\alpha/^\circ$        | 76.807(6)                                                                     |
| $\beta/^\circ$         | 75.289(6)                                                                     |
| $\gamma/^\circ$        | 84.733(7)                                                                     |
| Volume/ $\text{\AA}^3$ | 2086.7(17)                                                                    |



|                                                |                                                               |
|------------------------------------------------|---------------------------------------------------------------|
| Z                                              | 2                                                             |
| $\rho_{\text{calc}}/\text{cm}^3$               | 1.263                                                         |
| $\mu/\text{mm}^{-1}$                           | 0.204                                                         |
| F(000)                                         | 828.0                                                         |
| Crystal size/ $\text{mm}^3$                    | $0.14 \times 0.11 \times 0.09$                                |
| Radiation                                      | MoK $\alpha$ ( $\lambda = 0.71073$ )                          |
| $2\Theta$ range for data collection/ $^\circ$  | 3.086 to 50.054                                               |
| Index ranges                                   | $-14 \leq h \leq 14, -15 \leq k \leq 15, -16 \leq l \leq 16$  |
| Reflections collected                          | 20197                                                         |
| Independent reflections                        | 7357 [ $R_{\text{int}} = 0.0684, R_{\text{sigma}} = 0.1096$ ] |
| Data/restraints/parameters                     | 7357/468/541                                                  |
| Goodness-of-fit on $F^2$                       | 1.176                                                         |
| Final R indexes [ $I \geq 2\sigma(I)$ ]        | $R_1 = 0.1270, wR_2 = 0.3448$                                 |
| Final R indexes [all data]                     | $R_1 = 0.2213, wR_2 = 0.4085$                                 |
| Largest diff. peak/hole / $e \text{ \AA}^{-3}$ | 1.13/-0.32                                                    |
